# Supplementary material
Source: MDPI journal article supplement (https://www.mdpi.com/2312-7481/8/11/151)
Supplement: s1 [file s1]

## **Supplementary Material for**

# **Effect of Ligand Substitution on Zero-Field Slow Magnetic Relaxation in Mononuclear Dy(III) $\beta$ -Diketonate Complexes with Phenanthroline-Based Ligands**

Egor V. Gorshkov <sup>1,2</sup>, Denis V. Korchagin <sup>1,\*</sup>, Elena A. Yureva <sup>1,\*</sup>, Gennadii V. Shilov <sup>1</sup>, Mikhail V. Zhidkov <sup>1</sup>, Alexei I. Dmitriev <sup>1</sup>, Nikolay N. Efimov <sup>3</sup>, Andrew V. Palii <sup>1</sup> and Sergey M. Aldoshin <sup>1</sup>

## Contents:

**Figure S1.** FT-IR spectra for **1**, dmdophen (**3**) and [Dy(acac)<sub>3</sub>(H<sub>2</sub>O)<sub>2</sub>]·H<sub>2</sub>O (**5**).

**Figure S2.** FT-IR spectra for **2**, phendione (**4**) and **5**.

**Figure S3.** Powder X-ray diffraction pattern of polycrystalline sample for **1**.

**Figure S4.** Powder X-ray diffraction pattern of polycrystalline sample for **2**.

**Table S1.** Crystal data and structure refinement for **1** and **2**.

**Table S2.** Selected bond lengths (Å) and angles (°) for **1** and **2**.

**Table S3.** The local symmetry of Dy(III) ion for **1** and **2** defined by the continuous shape measure (CShM) analysis with *SHAPE* software.

**Figure S5.** Short intra- and intermolecular contacts in crystal packing of **1** (top) and **2** (bottom).

**Figure S6.** Frequency dependences of the in-phase AC susceptibility (a) and Cole–Cole plots (b) for **1** at zero DC field and temperatures from 2 to 20 K in increment of 2 K.

**Table S4.** Best fit parameters for **1** at zero DC field.

**Figure S7.** Frequency dependences of the in-phase (a) and out-of-phase (b) AC susceptibility, Cole–Cole plots (c) for **1** at 10 K and indicated DC fields.

**Figure S8.** Field dependence of the inverse relaxation time  $\tau^{-1}$  for **1** at 10 K.

**Figure S9.** Frequency dependences of the in-phase AC susceptibility (a) and Cole–Cole plots (b) for **1** at 1000 Oe DC field and temperatures from 8 to 20 K in increment of 2 K.

**Table S5.** Best fit parameters for **1** at 1000 Oe DC field.

**Figure S10.** Frequency dependences of the in-phase AC susceptibility (a) and Cole–Cole plots (b) for **2** at zero DC field and temperatures from 2 to 20 K.

**Table S6.** Best fit parameters for **2** at zero DC field.

**Figure S11.** Frequency dependences of the in-phase (a) and out-of-phase (b) AC susceptibility, Cole–Cole plots (c) for **2** at 10 K and indicated DC fields.

**Figure S12.** Field dependence of the inverse relaxation time  $\tau^{-1}$  for **2** at 10 K.

**Figure S13.** Frequency dependences of the in-phase AC susceptibility (a) and Cole–Cole plots (b) for **2** at DC field 1000 Oe and temperatures from 8 to 20 K.

**Table S7.** Best fit parameters for **2** at 1000 Oe DC field.

**Table S8.** SINGLE\_ANISO computed wave function decomposition analysis for lowest KDs of Dy(III) ions in **1** and **2**. It is shown only main (>10%) contributions.

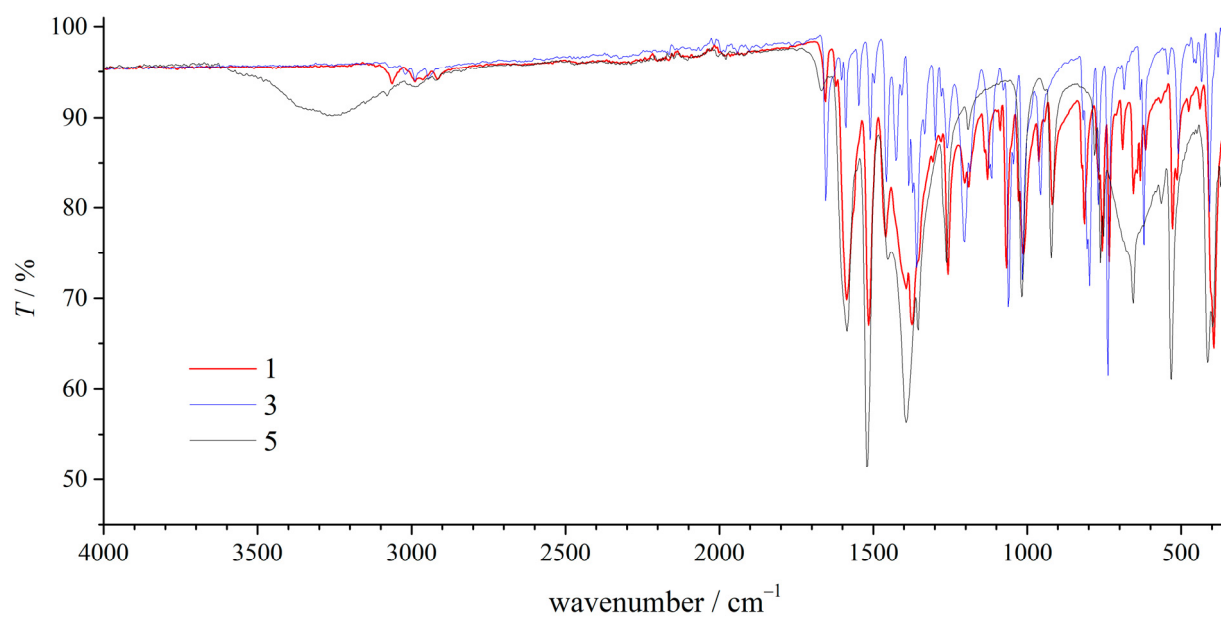

**Figure S1.** FT-IR spectra for **1**, dmdophen (**3**) and  $[\text{Dy}(\text{acac})_3(\text{H}_2\text{O})_2] \cdot \text{H}_2\text{O}$  (**5**).

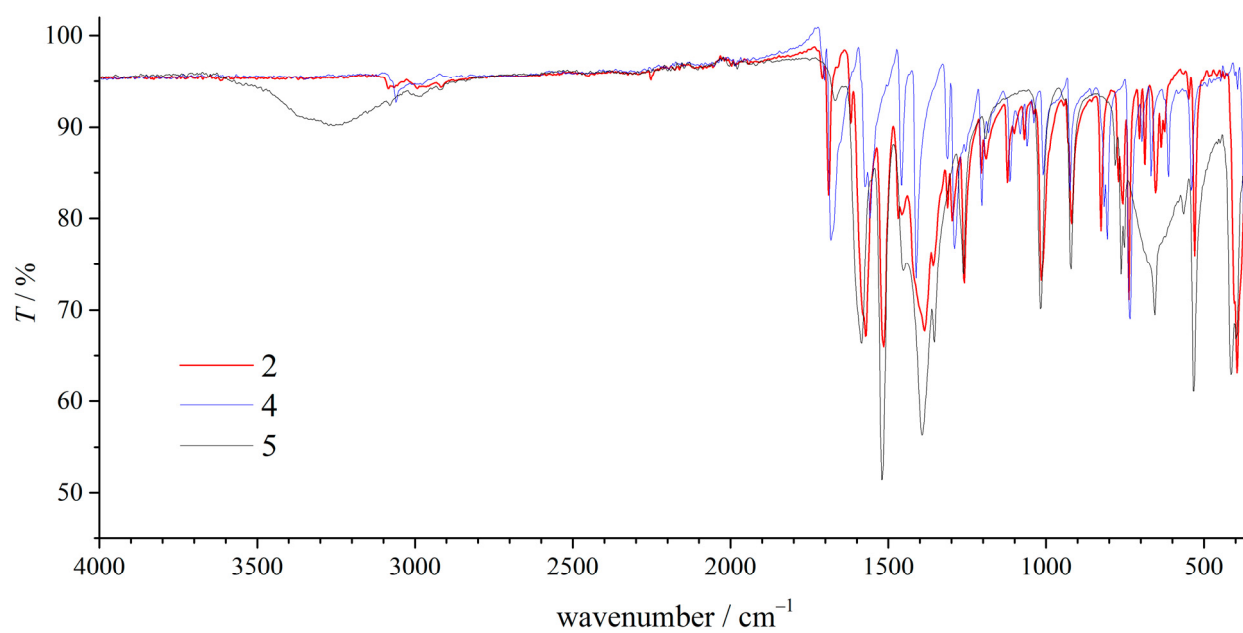

**Figure S2.** FT-IR spectra for **2**, phendione (**4**) and **5**.

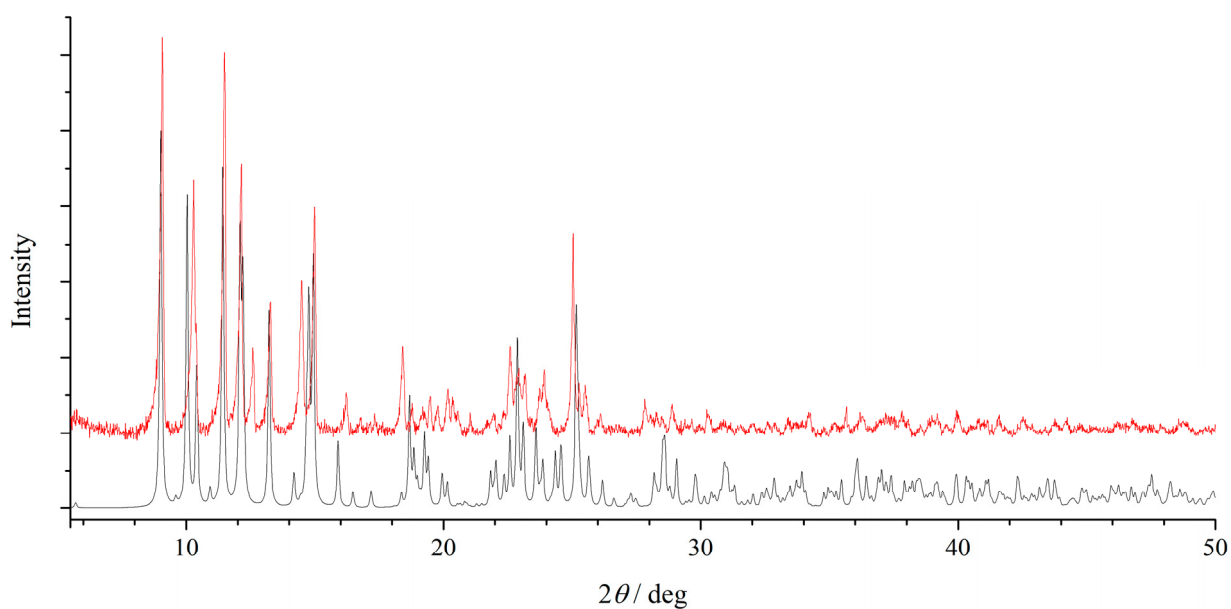

**Figure S3.** Powder X-ray diffraction pattern of polycrystalline sample for **1**: experimental (top) and simulated (bottom).

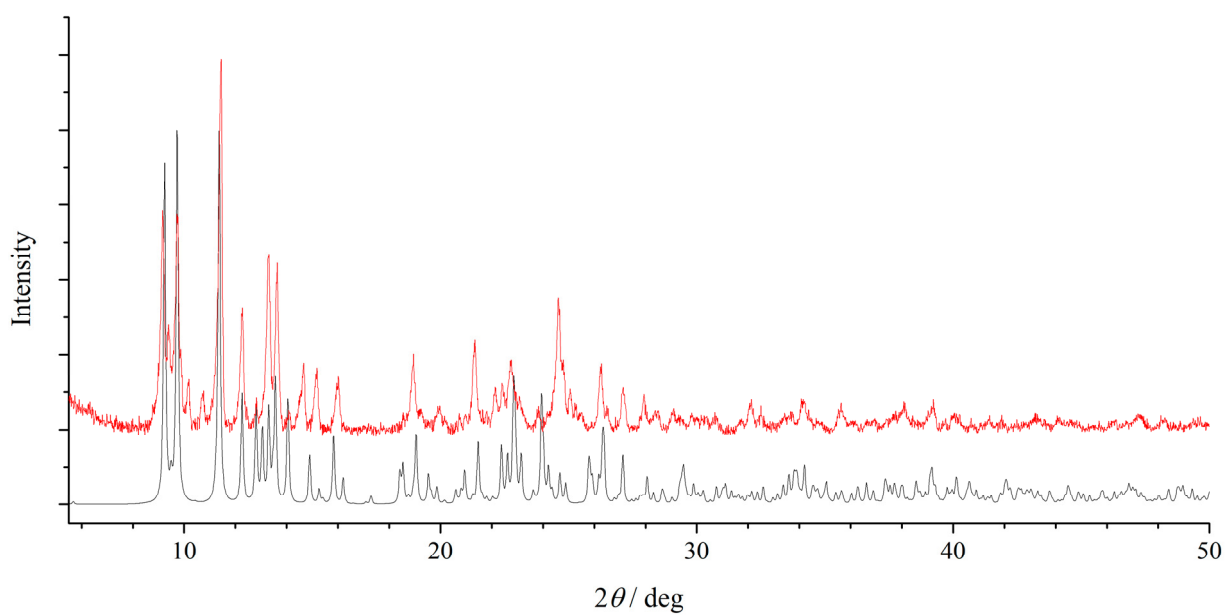

**Figure S4.** Powder X-ray diffraction pattern of polycrystalline sample for **2**: experimental (top) and simulated (bottom).

**Table S1.** Crystal data and structure refinement for **1** and **2**.

| Parameters                                                                        | <b>1</b>                                                        | <b>2</b>                                                        |
|-----------------------------------------------------------------------------------|-----------------------------------------------------------------|-----------------------------------------------------------------|
| Empirical formula                                                                 | C <sub>30</sub> H <sub>33</sub> DyN <sub>2</sub> O <sub>8</sub> | C <sub>29</sub> H <sub>27</sub> DyN <sub>3</sub> O <sub>8</sub> |
| Formula weight, g/mol                                                             | 712.08                                                          | 708.03                                                          |
| Temperature, K                                                                    | 100(1)                                                          | 150(1)                                                          |
| Crystal system; space group                                                       | Triclinic; P-1                                                  | Triclinic; P-1                                                  |
| <i>a</i> , Å                                                                      | 9.5844(3)                                                       | 9.5998(10)                                                      |
| <i>b</i> , Å                                                                      | 9.9719(3)                                                       | 9.6354(9)                                                       |
| <i>c</i> , Å                                                                      | 15.9368(5)                                                      | 16.1461(8)                                                      |
| <i>α</i> , deg.                                                                   | 84.771(3)                                                       | 104.794(6)                                                      |
| <i>β</i> , deg.                                                                   | 76.665(3)                                                       | 94.535(6)                                                       |
| <i>γ</i> , deg.                                                                   | 79.950(3)                                                       | 90.536(8)                                                       |
| Volume, Å <sup>3</sup>                                                            | 1457.29(8)                                                      | 1438.8(2)                                                       |
| Z; <i>ρ</i> (calculated), g/cm <sup>3</sup>                                       | 2; 1.623                                                        | 2; 1.634                                                        |
| <i>μ</i> , mm <sup>-1</sup>                                                       | 2.616                                                           | 2.651                                                           |
| F(000)                                                                            | 714                                                             | 704                                                             |
| Crystal size, mm                                                                  | 0.15 x 0.10 x 0.08                                              | 0.22 x 0.12 x 0.07                                              |
| <i>θ</i> range, deg.                                                              | 2.784 to 31.672                                                 | 2.823 to 26.064                                                 |
| Reflections collected                                                             | 14726                                                           | 10211                                                           |
| Reflections unique [R(int)]                                                       | 8538 [0.0348]                                                   | 5676 [0.0610]                                                   |
| Completeness to <i>θ</i> = 25.242°                                                | 99.9 %                                                          | 99.7 %                                                          |
| Number of parameters                                                              | 378                                                             | 371                                                             |
| Goodness-of-fit on F <sup>2</sup>                                                 | 1.001                                                           | 1.181                                                           |
| Final <i>R</i> <sub>1</sub> ; <i>wR</i> <sub>2</sub> [ <i>I</i> > 2σ( <i>I</i> )] | 0.0327; 0.0548                                                  | 0.1080; 0.2836                                                  |
| <i>R</i> <sub>1</sub> ; <i>wR</i> <sub>2</sub> (all data)                         | 0.0404; 0.0583                                                  | 0.1247; 0.2906                                                  |
| Δ <i>ρ</i> <sub>max</sub> and Δ <i>ρ</i> <sub>min</sub> , e·Å <sup>-3</sup>       | 1.126 and -1.095                                                | 7.875 and -3.562                                                |

**Table S2.** Selected bond lengths (Å) and angles (°) for **1** and **2**.

| <b>1</b>                  | <b>2</b>                 |
|---------------------------|--------------------------|
| Dy(1)-O(4) 2.283(2)       | Dy(1)-O(5) 2.32(1)       |
| Dy(1)-O(3) 2.298(2)       | Dy(1)-O(6) 2.30(1)       |
| Dy(1)-O(1) 2.319(2)       | Dy(1)-O(2) 2.33(1)       |
| Dy(1)-O(2) 2.319(2)       | Dy(1)-O(1) 2.31(1)       |
| Dy(1)-O(5) 2.340(2)       | Dy(1)-O(3) 2.33(1)       |
| Dy(1)-O(6) 2.345(2)       | Dy(1)-O(4) 2.31(1)       |
| Dy(1)-N(1) 2.603(2)       | Dy(1)-N(1) 2.60(1)       |
| Dy(1)-N(2) 2.632(2)       | Dy(1)-N(2) 2.60(1)       |
| O(4)-Dy(1)-O(3) 73.97(7)  | O(6)-Dy(1)-O(5) 74.4(5)  |
| O(4)-Dy(1)-O(2) 77.68(7)  | O(1)-Dy(1)-O(5) 75.9(5)  |
| O(3)-Dy(1)-O(2) 124.88(7) | O(6)-Dy(1)-O(1) 121.1(4) |
| O(4)-Dy(1)-O(1) 114.59(7) | O(5)-Dy(1)-O(2) 117.6(5) |
| O(3)-Dy(1)-O(1) 76.76(6)  | O(6)-Dy(1)-O(2) 76.6(4)  |
| O(2)-Dy(1)-O(1) 73.65(7)  | O(1)-Dy(1)-O(2) 74.0(4)  |
| O(4)-Dy(1)-O(5) 140.94(6) | O(5)-Dy(1)-O(3) 138.6(5) |
| O(3)-Dy(1)-O(5) 144.93(7) | O(6)-Dy(1)-O(3) 146.9(4) |
| O(2)-Dy(1)-O(5) 77.61(7)  | O(1)-Dy(1)-O(3) 79.5(5)  |
| O(1)-Dy(1)-O(5) 86.50(6)  | O(2)-Dy(1)-O(3) 86.1(5)  |
| O(4)-Dy(1)-O(6) 137.29(6) | O(4)-Dy(1)-O(5) 138.5(5) |
| O(3)-Dy(1)-O(6) 76.61(6)  | O(6)-Dy(1)-O(4) 77.1(5)  |
| O(2)-Dy(1)-O(6) 145.02(7) | O(1)-Dy(1)-O(4) 145.4(5) |
| O(1)-Dy(1)-O(6) 87.44(7)  | O(4)-Dy(1)-O(2) 83.5(4)  |
| O(5)-Dy(1)-O(6) 72.00(6)  | O(4)-Dy(1)-O(3) 73.0(5)  |
| O(4)-Dy(1)-N(1) 75.73(7)  | O(5)-Dy(1)-N(1) 70.3(4)  |
| O(3)-Dy(1)-N(1) 136.32(7) | O(6)-Dy(1)-N(1) 133.1(4) |
| O(2)-Dy(1)-N(1) 77.13(6)  | O(1)-Dy(1)-N(1) 78.8(4)  |
| O(1)-Dy(1)-N(1) 145.55(6) | O(2)-Dy(1)-N(1) 148.1(4) |
| O(5)-Dy(1)-N(1) 69.59(7)  | O(3)-Dy(1)-N(1) 72.6(4)  |
| O(6)-Dy(1)-N(1) 107.13(7) | O(4)-Dy(1)-N(1) 111.3(4) |
| O(4)-Dy(1)-N(2) 73.39(7)  | O(5)-Dy(1)-N(2) 73.8(5)  |
| O(3)-Dy(1)-N(2) 78.97(6)  | O(6)-Dy(1)-N(2) 78.9(4)  |

|                           |                          |
|---------------------------|--------------------------|
| O(2)-Dy(1)-N(2) 134.77(7) | O(1)-Dy(1)-N(2) 136.8(4) |
| O(1)-Dy(1)-N(2) 150.71(6) | O(2)-Dy(1)-N(2) 148.3(4) |
| O(5)-Dy(1)-N(2) 104.66(7) | O(3)-Dy(1)-N(2) 104.3(5) |
| O(6)-Dy(1)-N(2) 71.10(7)  | O(4)-Dy(1)-N(2) 71.6(5)  |
| N(1)-Dy(1)-N(2) 62.59(6)  | N(1)-Dy(1)-N(2) 62.3(4)  |

**Table S3.** The local symmetry of Dy(III) ion for **1** and **2** defined by the continuous shape measure (CShM) analysis with *SHAPE* software [26, 27].

|          |               |                       |                                            | <b>1</b>     | <b>2</b>     |
|----------|---------------|-----------------------|--------------------------------------------|--------------|--------------|
| 1        | OP-8          | D <sub>8h</sub>       | Octagon                                    | 30.864       | 30.119       |
| 2        | HPY-8         | C <sub>7v</sub>       | Heptagonal pyramid                         | 21.796       | 22.284       |
| 3        | HBPY-8        | D <sub>6h</sub>       | Hexagonal bipyramid                        | 15.895       | 16.874       |
| 4        | CU-8          | O <sub>h</sub>        | Cube                                       | 9.843        | 10.217       |
| <b>5</b> | <b>SAPR-8</b> | <b>D<sub>4d</sub></b> | <b>Square antiprism</b>                    | <b>0.679</b> | <b>0.543</b> |
| 6        | TDD-8         | D <sub>2d</sub>       | Triangular dodecahedron                    | 2.405        | 2.216        |
| 7        | JGBF-8        | D <sub>2d</sub>       | Johnson gyrobifastigium J26                | 15.749       | 16.245       |
| 8        | JETBPY-8      | D <sub>3h</sub>       | Johnson elongated triangular bipyramid J14 | 28.574       | 28.233       |
| 9        | JBTPR-8       | C <sub>2v</sub>       | Biaugmented trigonal prism J50             | 3.027        | 2.699        |
| 10       | BTPR-8        | C <sub>2v</sub>       | Biaugmented trigonal prism                 | 2.414        | 2.090        |
| 11       | JSD-8         | D <sub>2d</sub>       | Snub diphenoid J84                         | 5.121        | 5.129        |
| 12       | TT-8          | T <sub>d</sub>        | Triakis tetrahedron                        | 10.698       | 11.057       |
| 13       | ETBPY-8       | D <sub>3h</sub>       | Elongated trigonal bipyramid               | 24.828       | 24.531       |

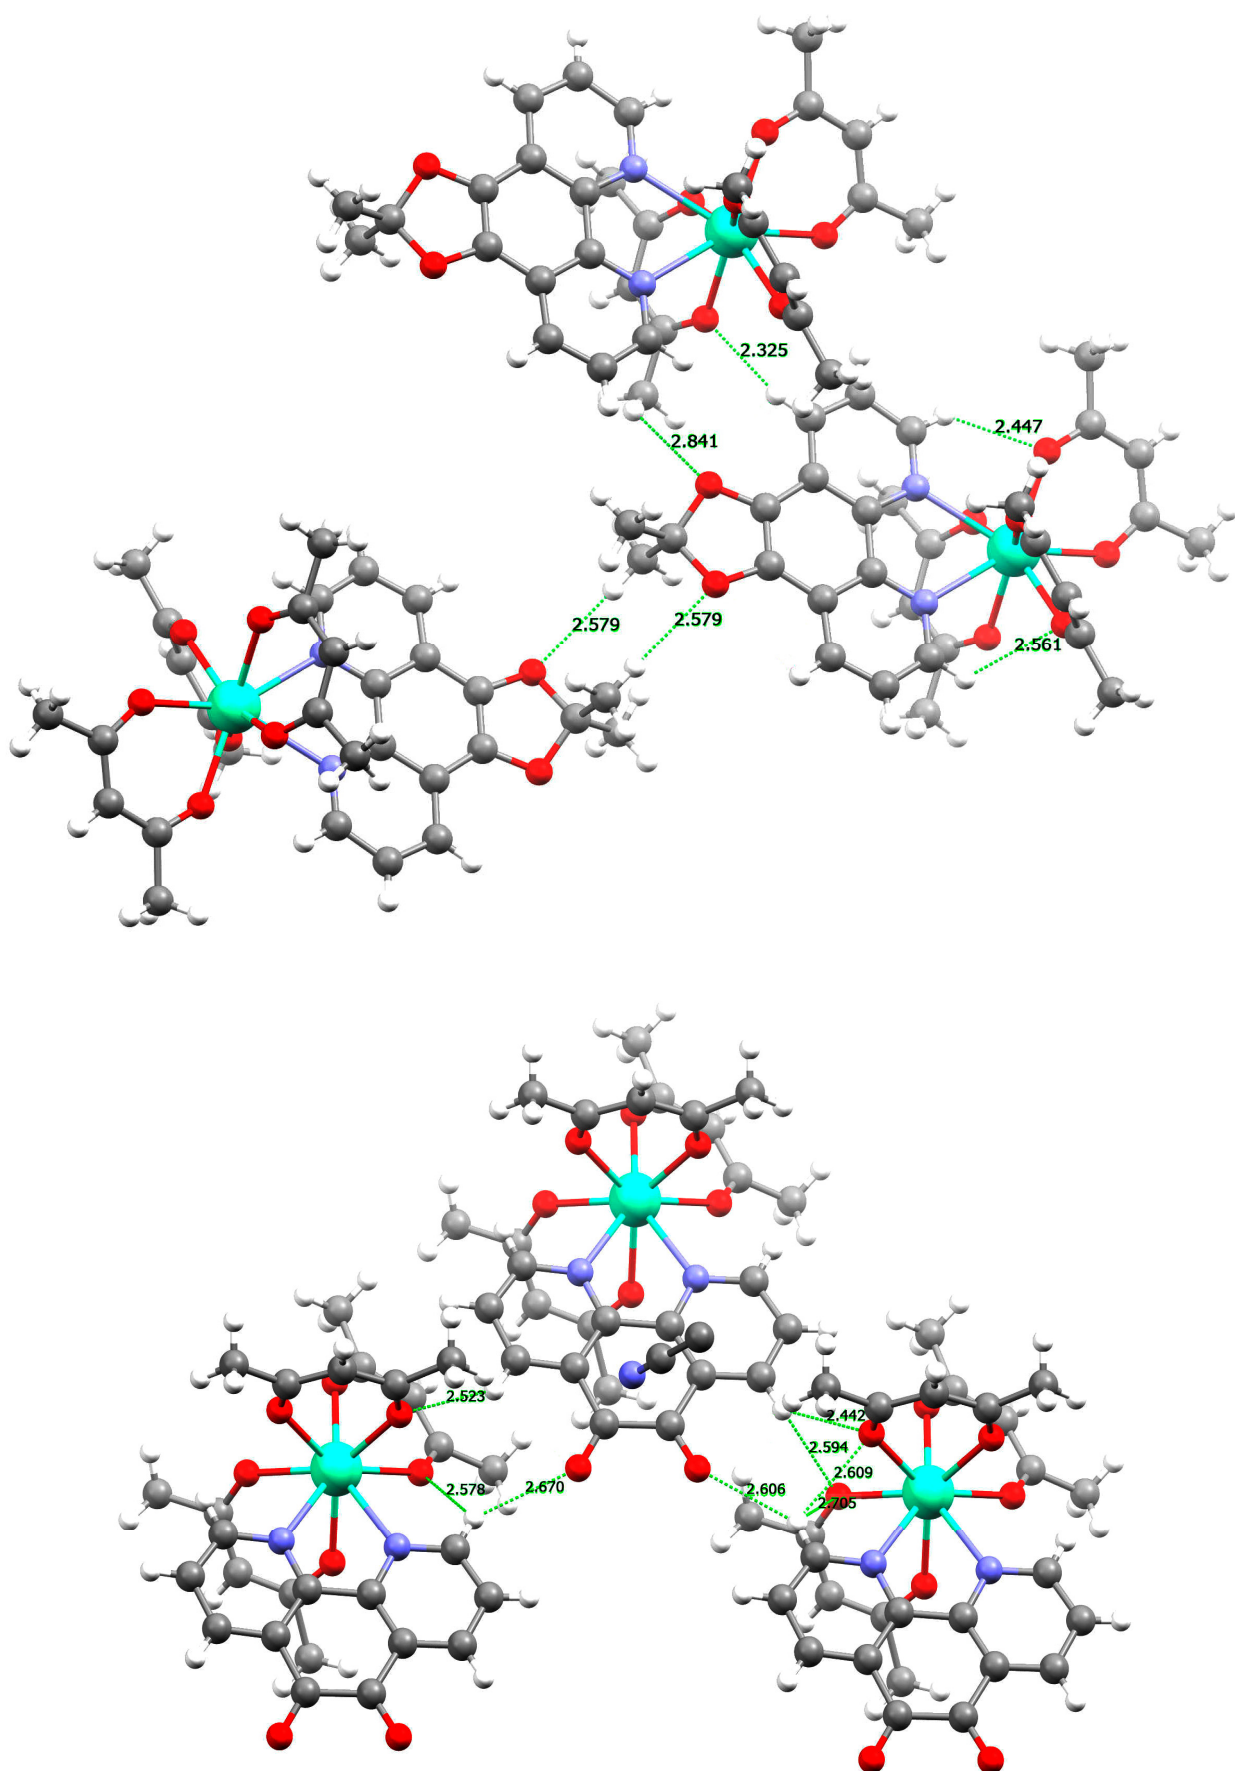

**Figure S5.** Short intra- and intermolecular contacts in crystal packing of **1** (top) and **2** (bottom).



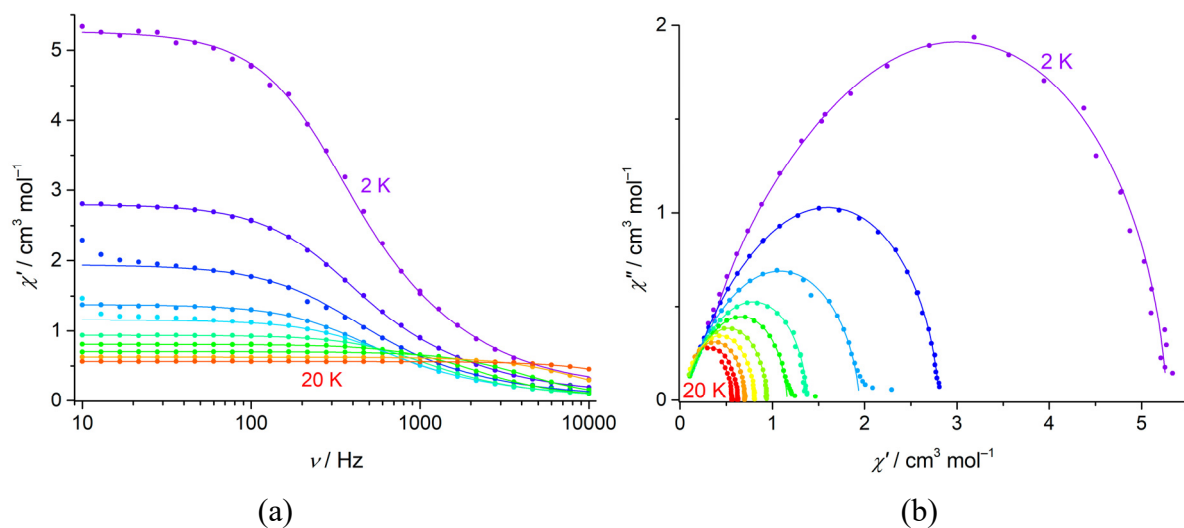

**Figure S6.** Frequency dependences of the in-phase AC susceptibility (a) and Cole–Cole plots (b) for **1** at zero DC field and temperatures from 2 to 20 K in increment of 2 K. Dots are experimental data; solid lines indicate fit data within the Debye model with parameters listed in Table S4.

**Table S4.** Best fit parameters for **1** at zero DC field.

| $T$ , K | $\chi^S$ ,<br>$\text{cm}^3/\text{mol}$ | $\Delta\chi_{T1}$ ,<br>$\text{cm}^3/\text{mol}$ | $\tau_1$ , s | $\alpha_1$ | $\Delta\chi_{T2}$ ,<br>$\text{cm}^3/\text{mol}$ | $\tau_2$ , s | $\alpha_2$ | Adj. $R^2$ |
|---------|----------------------------------------|-------------------------------------------------|--------------|------------|-------------------------------------------------|--------------|------------|------------|
| 2       | 1.71E-01                               | 3.08                                            | 5.073E-04    | 0.032      | 1.81                                            | 1.273E-04    | 0.220      | 0.99941    |
| 4       | 8.91E-02                               | 1.81                                            | 4.528E-04    | 0.056      | 0.86                                            | 1.020E-04    | 0.225      | 0.99971    |
| 6       | 4.91E-02                               | 1.33                                            | 4.054E-04    | 0.088      | 0.49                                            | 8.337E-05    | 0.231      | 0.99870    |
| 8       | 4.26E-02                               | 0.85                                            | 3.699E-04    | 0.034      | 0.49                                            | 9.391E-05    | 0.223      | 0.99951    |
| 10      | 5.55E-02                               | 0.72                                            | 2.765E-04    | 0.032      | 0.39                                            | 8.169E-05    | 0.214      | 0.99978    |
| 12      | 4.61E-02                               | 0.73                                            | 1.548E-04    | 0.033      | 0.16                                            | 3.334E-05    | 0.128      | 0.99993    |
| 14      | 5.94E-02                               | 0.75                                            | 7.465E-05    | 0.055      |                                                 |              |            | 0.99952    |
| 16      | 4.74E-02                               | 0.66                                            | 3.862E-05    | 0.035      |                                                 |              |            | 0.99988    |
| 17      | 5.82E-02                               | 0.64                                            | 2.718E-05    | 0.032      |                                                 |              |            | 0.99991    |
| 18      | 4.00E-02                               | 0.58                                            | 1.810E-05    | 0.032      |                                                 |              |            | 0.99979    |
| 20      | 2.01E-02                               | 0.54                                            | 7.495E-06    | 0.038      |                                                 |              |            | 0.99990    |
| 22      | 1.00E-02                               | 0.50                                            | 2.832E-06    | 0.060      |                                                 |              |            | 0.99990    |

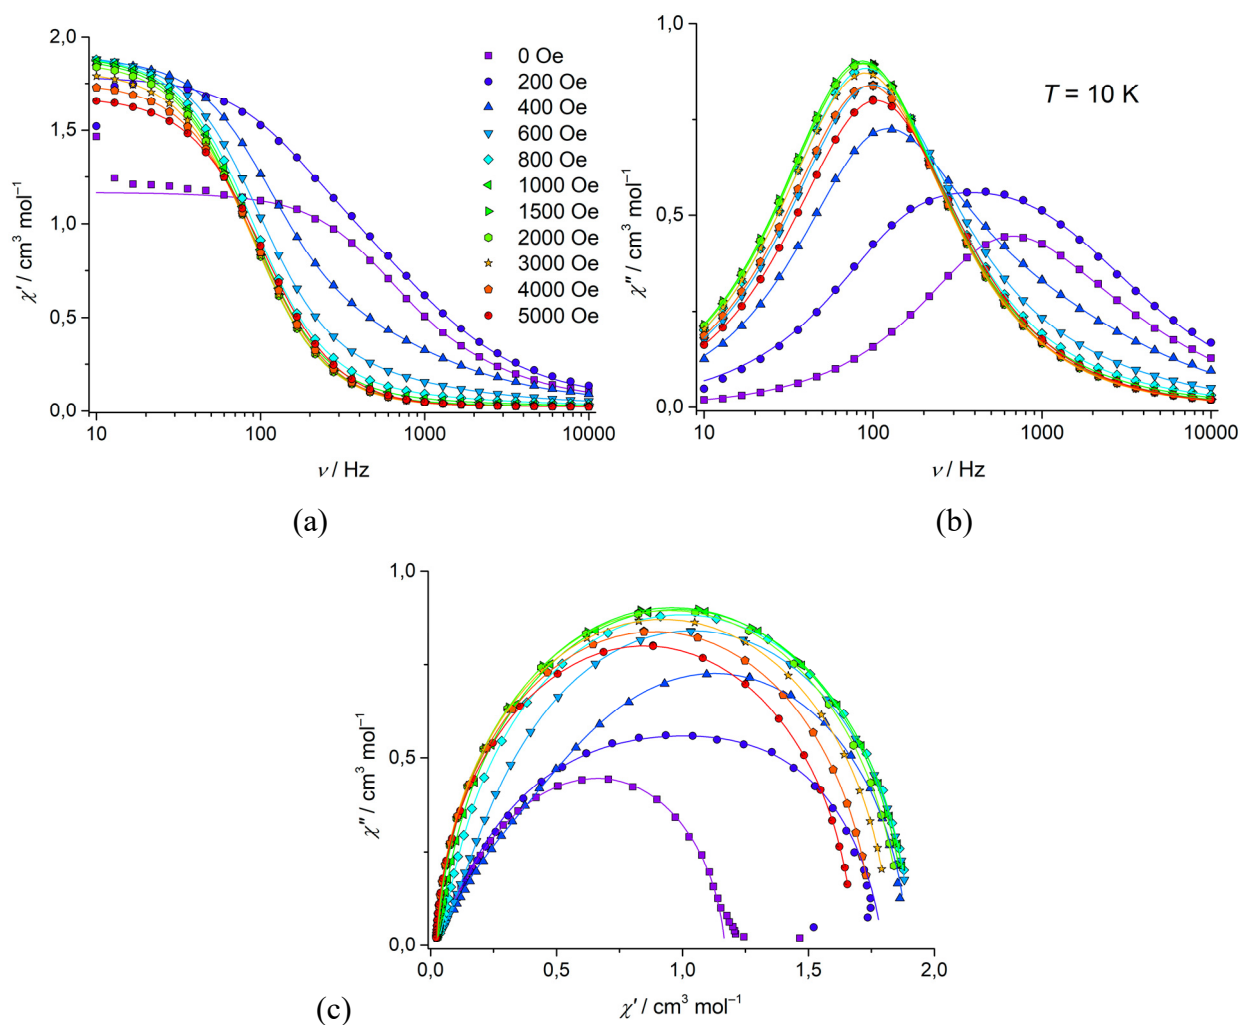

**Figure S7.** Frequency dependences of the in-phase (a) and out-of-phase (b) AC susceptibility, Cole–Cole plots (c) for **1** at 10 K and indicated DC fields. Symbols are experimental data; solid lines indicate fit data within the Debye model.

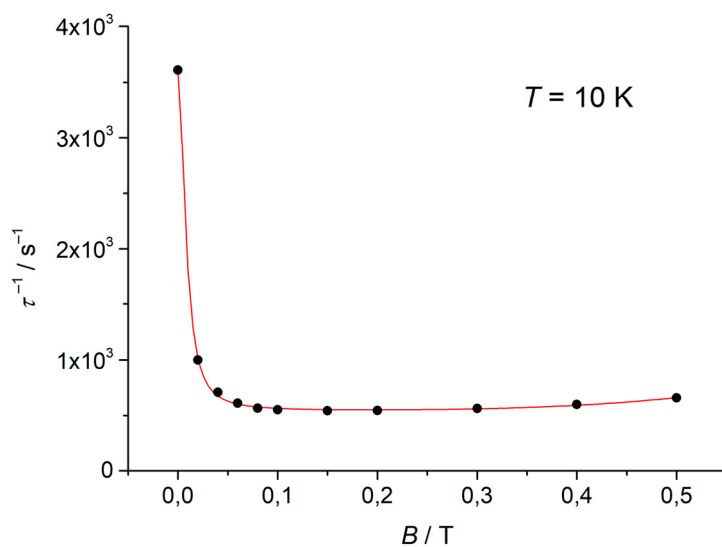

**Figure S8.** Field dependence of the inverse relaxation time  $\tau^{-1}$  for **1** at 10 K.

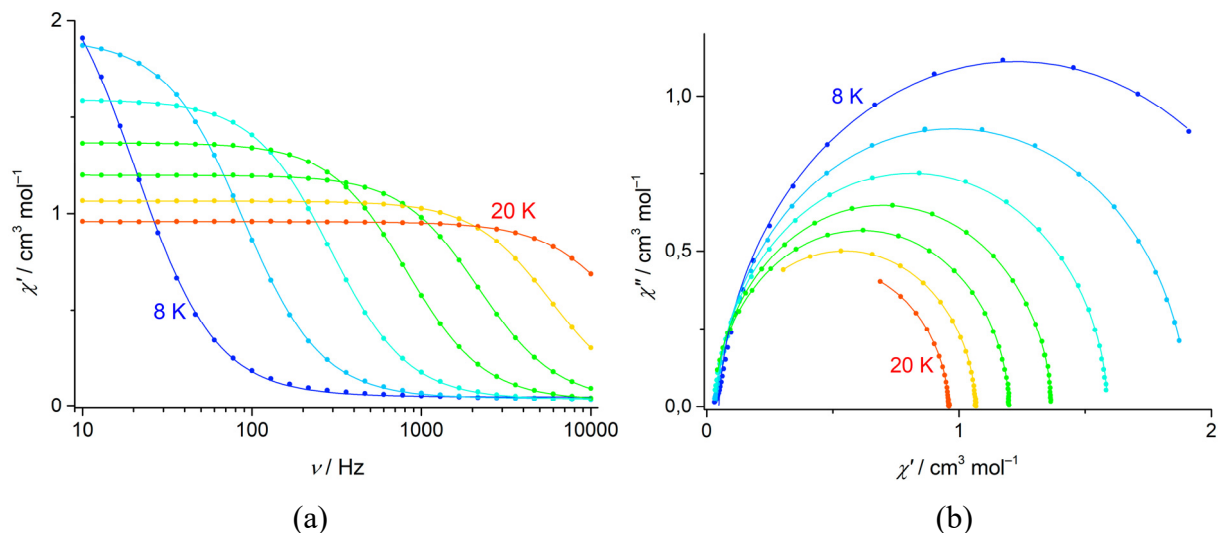

**Figure S9.** Frequency dependences of the in-phase AC susceptibility (a) and Cole–Cole plots (b) for **1** at 1000 Oe DC field and temperatures from 8 to 20 K in increment of 2 K. Dots are experimental data; solid lines indicate fit data within the generalized Debye model with parameters listed in Table S5.

**Table S5.** Best fit parameters for **1** at 1000 Oe DC field.

| $T$ , K | $\chi_s$ , cm <sup>3</sup> /mol | $\Delta\chi_T$ , cm <sup>3</sup> /mol | $\tau$ , s | $\alpha$ | Adj. $R^2$ |
|---------|---------------------------------|---------------------------------------|------------|----------|------------|
| 6       | 5.56E-02                        | 3.22                                  | 5.506E-02  | 0.085    | 0.99548    |
| 7       | 5.13E-02                        | 2.79                                  | 1.932E-02  | 0.057    | 0.99918    |
| 8       | 4.81E-02                        | 2.35                                  | 7.740E-03  | 0.037    | 0.99966    |
| 9       | 4.40E-02                        | 2.08                                  | 3.580E-03  | 0.030    | 0.99984    |
| 10      | 3.99E-02                        | 1.87                                  | 1.800E-03  | 0.027    | 0.99992    |
| 12      | 3.48E-02                        | 1.55                                  | 5.466E-04  | 0.022    | 0.99997    |
| 14      | 3.06E-02                        | 1.34                                  | 1.933E-04  | 0.021    | 0.99999    |
| 16      | 2.91E-02                        | 1.17                                  | 7.299E-05  | 0.020    | 1.00000    |
| 17      | 3.07E-02                        | 1.09                                  | 4.492E-05  | 0.018    | 0.99999    |
| 18      | 2.79E-02                        | 1.04                                  | 2.735E-05  | 0.023    | 1.00000    |
| 19      | 2.88E-02                        | 0.98                                  | 1.651E-05  | 0.026    | 1.00000    |
| 20      | 1.69E-02                        | 0.94                                  | 9.689E-06  | 0.035    | 1.00000    |
| 22      | 9.25E-02                        | 0.78                                  | 3.712E-06  | 0.049    | 0.99999    |

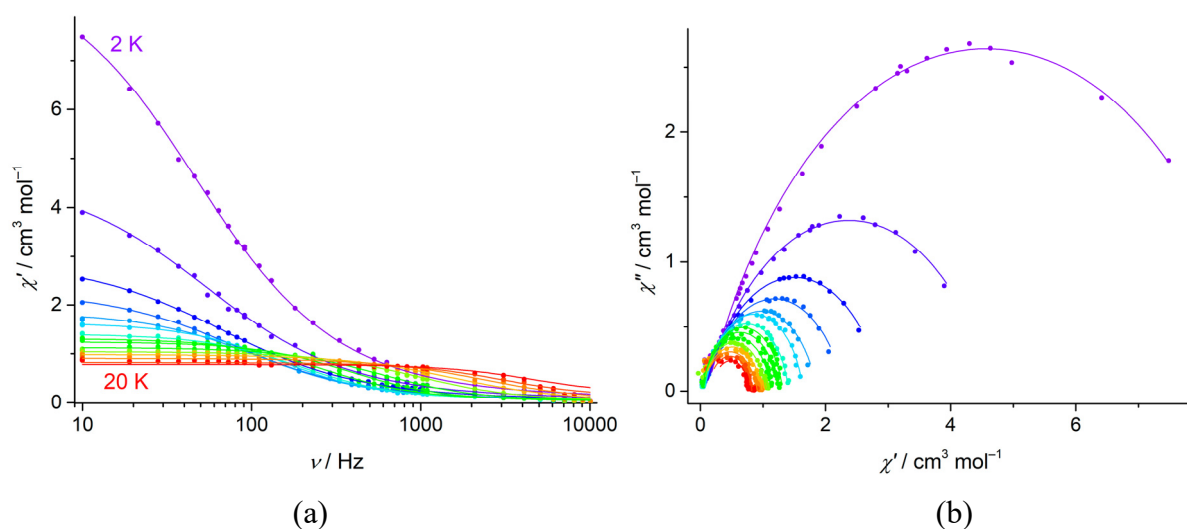

**Figure S10.** Frequency dependences of the in-phase AC susceptibility (a) and Cole–Cole plots (b) for **2** at zero DC field and temperatures from 2 to 20 K. Dots are experimental data; solid lines indicate fit data within the generalized Debye model with parameters listed in Table S6.

**Table S6.** Best fit parameters for **2** at zero DC field.

| $T$ , K | $\chi_s$ , cm <sup>3</sup> /mol | $\Delta\chi_T$ , cm <sup>3</sup> /mol | $\tau$ , s | $\alpha$ | Adj. $R^2$ |
|---------|---------------------------------|---------------------------------------|------------|----------|------------|
| 2       | 1.04E-01                        | 8.25                                  | 3.370E-03  | 0.274    | 0.99859    |
| 4       | 7.65E-02                        | 4.16                                  | 2.960E-03  | 0.280    | 0.99787    |
| 6       | 6.50E-02                        | 2.74                                  | 2.440E-03  | 0.273    | 0.99818    |
| 8       | 5.91E-02                        | 2.11                                  | 2.060E-03  | 0.240    | 0.99647    |
| 10      | 6.80E-02                        | 1.68                                  | 1.490E-03  | 0.188    | 0.99695    |
| 11      | 6.98E-02                        | 1.47                                  | 1.080E-03  | 0.133    | 0.99375    |
| 12      | 6.47E-02                        | 1.28                                  | 8.185E-04  | 0.118    | 0.99397    |
| 13      | 5.07E-02                        | 1.19                                  | 5.936E-04  | 0.120    | 0.99588    |
| 14      | 3.07E-02                        | 1.10                                  | 4.166E-04  | 0.116    | 0.99669    |
| 15      | 3.49E-02                        | 1.01                                  | 2.727E-04  | 0.122    | 0.99617    |
| 16      | 3.50E-02                        | 0.95                                  | 1.668E-04  | 0.142    | 0.99505    |
| 17      | 3.50E-02                        | 0.90                                  | 1.023E-04  | 0.171    | 0.99158    |
| 18      | 3.75E-02                        | 0.79                                  | 6.687E-05  | 0.164    | 0.99651    |
| 19      | 1.21E-01                        | 0.64                                  | 5.217E-05  | 0.103    | 0.98800    |
| 20      | 1.84E-01                        | 0.55                                  | 3.532E-05  | 0.091    | 0.99607    |

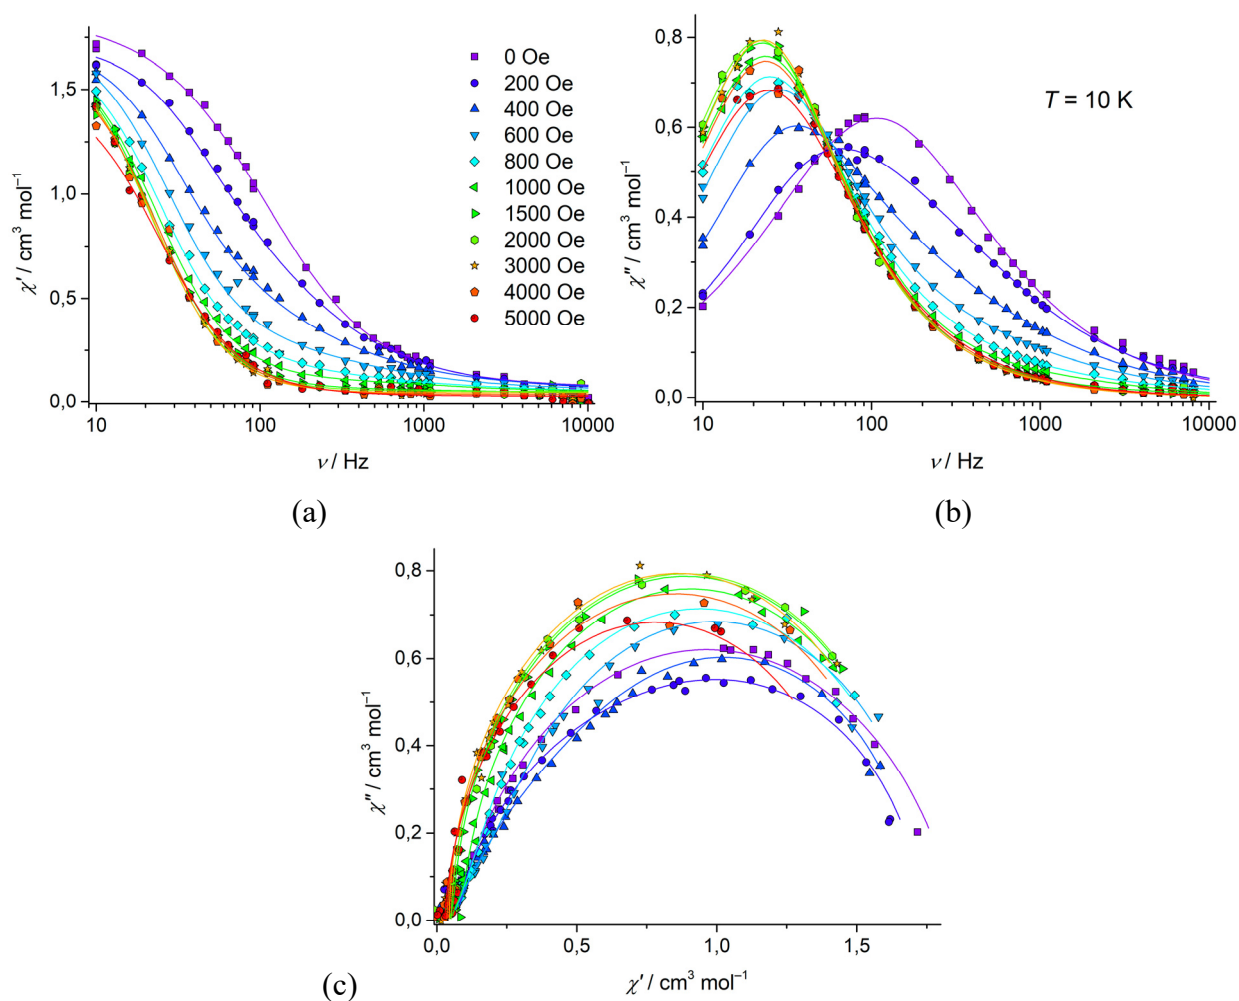

**Figure S11.** Frequency dependences of the in-phase (a) and out-of-phase (b) AC susceptibility, Cole–Cole plots (c) for **2** at 10 K and indicated DC fields. Symbols are experimental data; solid lines indicate fit data within the Debye model.

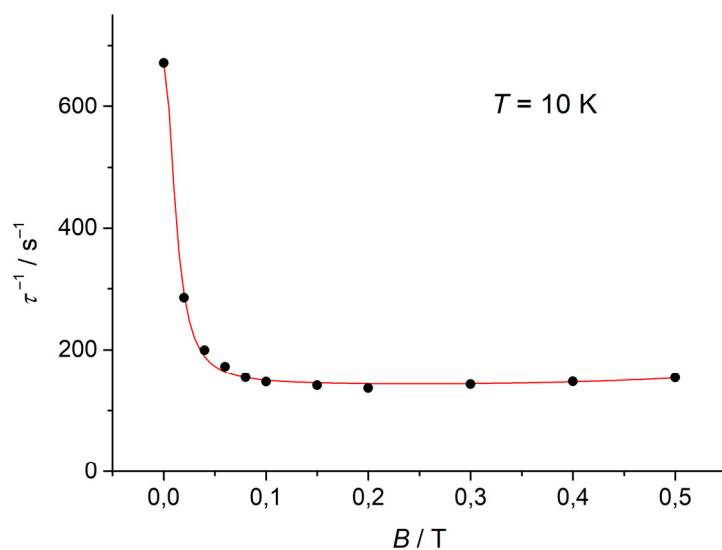

**Figure S12.** Field dependence of the inverse relaxation time  $\tau^{-1}$  for **2** at 10 K.

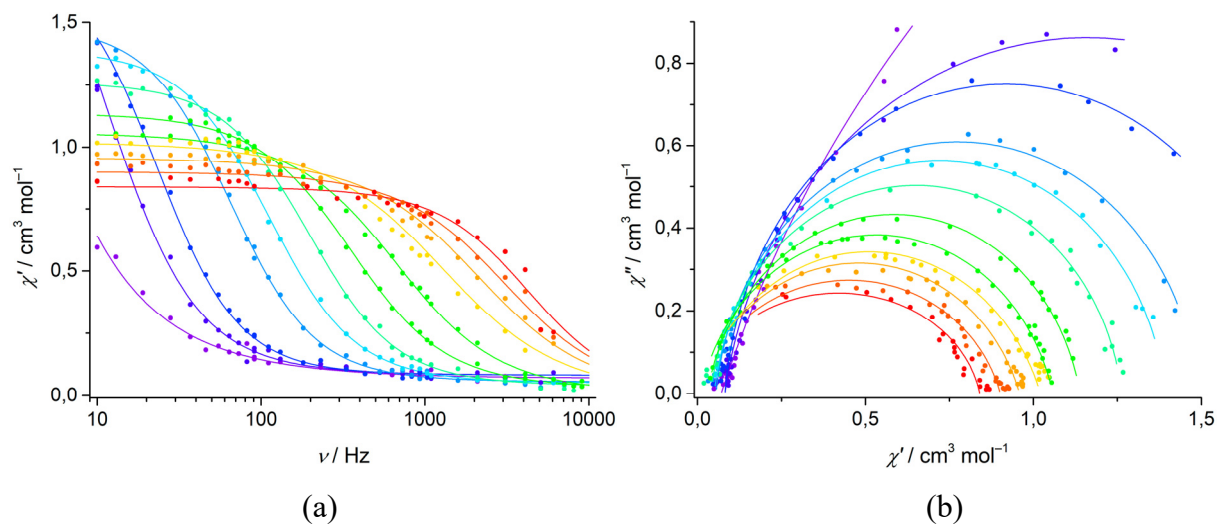

**Figure S13.** Frequency dependences of the in-phase AC susceptibility (a) and Cole–Cole plots (b) for **2** at DC field 1000 Oe and temperatures from 8 to 20 K. Dots are experimental data; solid lines indicate fit data within the generalized Debye model with parameters listed in Table S7.

**Table S7.** Best fit parameters for **2** at 1000 Oe DC field.

| $T$ , K | $\chi_s$ , $\text{cm}^3/\text{mol}$ | $\Delta\chi_T$ , $\text{cm}^3/\text{mol}$ | $\tau$ , s | $\alpha$ | Adj. $R^2$ |
|---------|-------------------------------------|-------------------------------------------|------------|----------|------------|
| 9       | 8.16E-02                            | 2.01                                      | 1.397E-02  | 0.098    | 0.99776    |
| 10      | 8.18E-02                            | 1.64                                      | 6.850E-03  | 0.055    | 0.99832    |
| 12      | 5.52E-02                            | 1.35                                      | 2.440E-03  | 0.065    | 0.99828    |
| 13      | 4.96E-02                            | 1.28                                      | 1.430E-03  | 0.078    | 0.99784    |
| 14      | 3.86E-02                            | 1.15                                      | 8.141E-04  | 0.082    | 0.99775    |
| 15      | 2.87E-02                            | 1.05                                      | 4.521E-04  | 0.121    | 0.99499    |
| 16      | 7.12E-03                            | 0.98                                      | 2.398E-04  | 0.156    | 0.99692    |
| 17      | 1.00E-03                            | 0.97                                      | 1.251E-04  | 0.214    | 0.99027    |
| 18      | 1.00E-03                            | 0.86                                      | 7.593E-05  | 0.191    | 0.99261    |
| 19      | 1.00E-03                            | 0.71                                      | 5.227E-05  | 0.163    | 0.99411    |
| 20      | 1.00E-03                            | 0.57                                      | 3.755E-05  | 0.107    | 0.99689    |

**Table S8.** SINGLE\_ANISO computed wave function decomposition analysis for lowest KDs of Dy(III) ions in **1** and **2**. It is shown only main (>10%) contributions.

| KD       | <b>1</b>                                                                                                                 | <b>2</b>                                                                                                                  |
|----------|--------------------------------------------------------------------------------------------------------------------------|---------------------------------------------------------------------------------------------------------------------------|
| <b>1</b> | 0.927 $ \pm 15/2\rangle$                                                                                                 | 0.873 $ \pm 15/2\rangle + 0.115  \pm 11/2\rangle$                                                                         |
| <b>2</b> | 0.775 $ \pm 13/2\rangle + 0.152  \pm 9/2\rangle$                                                                         | 0.554 $ \pm 13/2\rangle + 0.229  \pm 9/2\rangle$                                                                          |
| <b>3</b> | 0.401 $ \pm 11/2\rangle + 0.237  \pm 7/2\rangle + 0.135  \pm 3/2\rangle$                                                 | 0.287 $ \pm 11/2\rangle + 0.246  \pm 7/2\rangle + 0.116  \pm 13/2\rangle + 0.107  \pm 3/2\rangle$                         |
| <b>4</b> | 0.342 $ \pm 1/2\rangle + 0.206  \pm 5/2\rangle + 0.147  \pm 9/2\rangle + 0.122  \pm 11/2\rangle + 0.103  \pm 3/2\rangle$ | 0.248 $ \pm 1/2\rangle + 0.213  \pm 11/2\rangle + 0.207  \pm 9/2\rangle + 0.182  \pm 5/2\rangle$                          |
| <b>5</b> | 0.237 $ \pm 3/2\rangle + 0.191  \pm 5/2\rangle + 0.171  \pm 7/2\rangle + 0.169  \pm 9/2\rangle$                          | 0.265 $ \pm 3/2\rangle + 0.246  \pm 7/2\rangle + 0.165  \pm 5/2\rangle + 0.117  \pm 9/2\rangle + 0.105  \pm 1/2\rangle$   |
| <b>6</b> | 0.291 $ \pm 5/2\rangle + 0.256  \pm 7/2\rangle + 0.163  \pm 3/2\rangle + 0.143  \pm 9/2\rangle$                          | 0.342 $ \pm 5/2\rangle + 0.200  \pm 7/2\rangle + 0.197  \pm 3/2\rangle + 0.103  \pm 1/2\rangle$                           |
| <b>7</b> | 0.412 $ \pm 1/2\rangle + 0.304  \pm 3/2\rangle + 0.148  \pm 5/2\rangle$                                                  | 0.442 $ \pm 1/2\rangle + 0.305  \pm 3/2\rangle + 0.126  \pm 5/2\rangle$                                                   |
| <b>8</b> | 0.271 $ \pm 9/2\rangle + 0.226  \pm 7/2\rangle + 0.209  \pm 11/2\rangle + 0.126  \pm 5/2\rangle$                         | 0.255 $ \pm 9/2\rangle + 0.242  \pm 11/2\rangle + 0.179  \pm 7/2\rangle + 0.125  \pm 13/2\rangle + 0.102  \pm 5/2\rangle$ |
